# Supplementary material
Source: publisher figshare collection journal article supplement (https://acs.figshare.com/ndownloader/files/11549207)
Supplement: Supplementary file 1 [file 11549207]

Compound_ID	SMILES
4	O=C(CCCCC[Zn](Cl)Br[Li])OCC
5	O=C([H])C1=CC(CCCCCC(OCC)=O)=CC=C1
6	O=C(OCC)CCCCCC1=CC=CC(/C=C(Br)\Br)=C1
7	CC(C)(O)CCCCCC1=CC=CC(C#C)=C1
8	CC(C)([TESO])CCCCCC1=CC=CC(C#C)=C1
9a	CC(C)([TESO])CCCCCC1=CC=CC(/C(CC)=C/[Si](C)(C)C)=C1
10a	CC(C)([TESO])CCCCCC1=CC=CC(/C(CC)=C/I)=C1
11a	CC(C)([TESO])CCCCCC1=CC=CC(/C(CC)=C/B2OC(C)(C)C(C)(C)O2)=C1
9b	CC(C)([TESO])CCCCCC1=CC=CC(/C(CCC)=C/[Si](C)(C)C)=C1
10b	CC(C)([TESO])CCCCCC1=CC=CC(/C(CCC)=C/I)=C1
11b	CC(C)([TESO])CCCCCC1=CC=CC(/C(CCC)=C/B2OC(C)(C)C(C)(C)O2)=C1
9c	CC(C)([TESO])CCCCCC1=CC=CC(/C(CCCC)=C/[Si](C)(C)C)=C1
10c	CC(C)([TESO])CCCCCC1=CC=CC(/C(CCCC)=C/I)=C1
11c	CC(C)([TESO])CCCCCC1=CC=CC(/C(CCCC)=C/B2OC(C)(C)C(C)(C)O2)=C1
9d	CC(C)([TESO])CCCCCC1=CC=CC(/C(CCCCCC)=C/[Si](C)(C)C)=C1
10d	CC(C)([TESO])CCCCCC1=CC=CC(/C(CCCCCC)=C/I)=C1
11d	CC(C)([TESO])CCCCCC1=CC=CC(/C(CCCCCC)=C/B2OC(C)(C)C(C)(C)O2)=C1
9e	CC(C)([TESO])CCCCCC1=CC=CC(/C(CCCCCCC)=C/[Si](C)(C)C)=C1
10e	CC(C)([TESO])CCCCCC1=CC=CC(/C(CCCCCCC)=C/I)=C1
11e	CC(C)([TESO])CCCCCC1=CC=CC(/C(CCCCCCC)=C/B2OC(C)(C)C(C)(C)O2)=C1
2a	C=C1[C@@H](O)C[C@H](O)C/C1=C/C=C(CC)/C2=CC(CCCCCC(C)(O)C)=CC=C2
2b	C=C1[C@@H](O)C[C@H](O)C/C1=C/C=C(CCC)/C2=CC(CCCCCC(C)(O)C)=CC=C2
2c	C=C1[C@@H](O)C[C@H](O)C/C1=C/C=C(CCCC)/C2=CC(CCCCCC(C)(O)C)=CC=C2
2d	[nHex]/C(C1=CC(CCCCCC(C)(O)C)=CC=C1)=C\C=C2C[C@@H](O)C[C@H](O)C\2=C
2e	[nHep]/C(C1=CC(CCCCCC(C)(O)C)=CC=C1)=C\C=C2C[C@@H](O)C[C@H](O)C\2=C
